# Supplementary material for: Efficacy and Safety of Omeprazole for the Treatment of Acid Peptic Disorders: A Systematic Review and Meta-Analysis
Source: Hindawi journal article supplement (doi:10.1155/2024/9990554), 2024-03-28
Supplement: f1 [file 9990554.f1.docx]

**Efficacy and safety of omeprazole for the treatment of Acid Peptic Disorders: A systematic review and meta-analysis.**

**Supplementary Information**

Supplementary Information Table 1. PRISMA Checklist of literature search.

Supplementary Information Table 2. Excluded trials or treatment arms.

Supplementary Information Table 3. Frequency of heartburn healing in included trials.

Supplementary Information Table 4. Improvement in all symptoms as an outcome in patients with
 non-erosive NERD.

Supplementary Information Table 5. Outcomes for ulcer healing in patients with erosive ulcers and
 erosion healing for patients with erosive oesophagitis.

Supplementary Information Table 6. Definitions of ulcer healing in included trials.

Supplementary Information Table 7. Other reported outcomes in included trials.

Supplementary Information Table 8. Frequency of adverse event reporting in included trials.

Supplementary Information Table 9. Direct costs of PPI treatments based on included trials for patients
 with Acid Peptic Disorders

Supplementary Information Table 10. Risk of Bias in included trials.

Supplementary Information Figure 1. Funnel plot of publication bias for trials with outcome:
 improvement in heartburn symptoms. Egger’s test (p<0.001) indicates possible bias.

Supplementary Information Figure 2. Improved symptoms in NERD patients comparing omeprazole to
 other controls.

Supplementary Information Figure 3. Funnel plot for publication bias of trials with outcome:
 erosion or ulcer healing.

Supplementary Information Figure 4. Forest plot of relative risk of no adverse events of omeprazole
 compared to controls.

Supplementary Information Figure 5. Funnel plot of publication bias for trials reporting any adverse
 reaction data.

Supplementary Information Figure 6. Ulcer healing by country where trial was conducted and by type of
 proton pump inhibitor.

Supplementary Information Figure 7. Subgroup-degree of blinding for heartburn relief

Supplementary Information Figure 8. Trials with low risk of bias for outcome: heartburn symptoms
 relieved/improved/cured.

Supplementary Information Figure 9. Trials with low risk of bias for outcome erosion/ulcer healed.

Supplementary Information Figure 10. Data Extraction Form

**Supplementary Information Table 1.** PRISMA Checklist

| **Section and Topic** | **Item #** | **Checklist item** | **see page or other** |
| --- | --- | --- | --- |
| **TITLE** | | |  |
| Title | 1 | Identify the report as a systematic review. | P 1 |
| **ABSTRACT** | | |  |
| Abstract | 2 | See the PRISMA 2020 for Abstracts checklist. | P 1 |
| **INTRODUCTION** | | |  |
| Rationale | 3 | Describe the rationale for the review in the context of existing knowledge. | P2 |
| Objectives | 4 | Provide an explicit statement of the objective(s) or question(s) the review addresses. | P2 |
| **METHODS** | | |  |
| Eligibility criteria | 5 | Specify the inclusion and exclusion criteria for the review and how studies were grouped for the syntheses. | P3 |
| Information sources | 6 | Specify all databases, registers, websites, organisations, reference lists and other sources searched or consulted to identify studies. Specify the date when each source was last searched or consulted. | P3 |
| Search strategy | 7 | Present the full search strategies for all databases, registers and websites, including any filters and limits used. | P3 |
| Selection process | 8 | Specify the methods used to decide whether a study met the inclusion criteria of the review, including how many reviewers screened each record and each report retrieved, whether they worked independently, and if applicable, details of automation tools used in the process. | P4 |
| Data collection process | 9 | Specify the methods used to collect data from reports, including how many reviewers collected data from each report, whether they worked independently, any processes for obtaining or confirming data from study investigators, and if applicable, details of automation tools used in the process. | P4 |
| Data items | 10a | List and define all outcomes for which data were sought. Specify whether all results that were compatible with each outcome domain in each study were sought (e.g. for all measures, time points, analyses), and if not, the methods used to decide which results to collect. | P4 & 5 |
| 10b | List and define all other variables for which data were sought (e.g. participant and intervention characteristics, funding sources). Describe any assumptions made about any missing or unclear information. | P5 |
| Study risk of bias assessment | 11 | Specify the methods used to assess risk of bias in the included studies, including details of the tool(s) used, how many reviewers assessed each study and whether they worked independently, and if applicable, details of automation tools used in the process. | P5 |
| Effect measures | 12 | Specify for each outcome the effect measure(s) (e.g. risk ratio, mean difference) used in the synthesis or presentation of results. | P5 & 6 |
| Synthesis methods | 13a | Describe the processes used to decide which studies were eligible for each synthesis (e.g. tabulating the study intervention characteristics and comparing against the planned groups for each synthesis (item #5)). | P4 |
| 13b | Describe any methods required to prepare the data for presentation or synthesis, such as handling of missing summary statistics, or data conversions. | P5 |
| 13c | Describe any methods used to tabulate or visually display results of individual studies and syntheses. | P5 |
| 13d | Describe any methods used to synthesize results and provide a rationale for the choice(s). If meta-analysis was performed, describe the model(s), method(s) to identify the presence and extent of statistical heterogeneity, and software package(s) used. | P5 & 6 |
| 13e | Describe any methods used to explore possible causes of heterogeneity among study results (e.g. subgroup analysis, meta-regression). | P5 & 6 |
| 13f | Describe any sensitivity analyses conducted to assess robustness of the synthesized results. | P6 |
| Reporting bias assessment | 14 | Describe any methods used to assess risk of bias due to missing results in a synthesis (arising from reporting biases). | P5 |
| Certainty assessment | 15 | Describe any methods used to assess certainty (or confidence) in the body of evidence for an outcome. | Na |
| **RESULTS** | | |  |
| Study selection | 16a | Describe the results of the search and selection process, from the number of records identified in the search to the number of studies included in the review, ideally using a flow diagram. | P6, Fig 1 |
| 16b | Cite studies that might appear to meet the inclusion criteria, but which were excluded, and explain why they were excluded. | SI Table 2 |
| Study characteristics | 17 | Cite each included study and present its characteristics. | Table 1 |
| Risk of bias in studies | 18 | Present assessments of risk of bias for each included study. | SI Table 10 |
| Results of individual studies | 19 | For all outcomes, present, for each study: (a) summary statistics for each group (where appropriate) and (b) an effect estimate and its precision (e.g. confidence/credible interval), ideally using structured tables or plots. | Table 2, Fig 2, Fig 3 |
| Results of syntheses | 20a | For each synthesis, briefly summarise the characteristics and risk of bias among contributing studies. | SI Fig 8 & 9, SI Table 10 |
| 20b | Present results of all statistical syntheses conducted. If meta-analysis was done, present for each the summary estimate and its precision (e.g. confidence/credible interval) and measures of statistical heterogeneity. If comparing groups, describe the direction of the effect. | P7 & 8, Fig 2 & 3 |
| 20c | Present results of all investigations of possible causes of heterogeneity among study results. | SI Fig 5-9 |
| 20d | Present results of all sensitivity analyses conducted to assess the robustness of the synthesized results. | P6 |
| Reporting biases | 21 | Present assessments of risk of bias due to missing results (arising from reporting biases) for each synthesis assessed. | P9, SI Table 10 |
| Certainty of evidence | 22 | Present assessments of certainty (or confidence) in the body of evidence for each outcome assessed. | P7 & 8, Fig 2 & 32 |
| **DISCUSSION** | | |  |
| Discussion | 23a | Provide a general interpretation of the results in the context of other evidence. | P 10-12 |
| 23b | Discuss any limitations of the evidence included in the review. | P 11-12 |
| 23c | Discuss any limitations of the review processes used. | P11 |
| 23d | Discuss implications of the results for practice, policy, and future research. | P 12 |
| **OTHER INFORMATION** | | |  |
| Registration and protocol | 24a | Provide registration information for the review, including register name and registration number, or state that the review was not registered. | P2-3 |
| 24b | Indicate where the review protocol can be accessed, or state that a protocol was not prepared. | P2 |
| 24c | Describe and explain any amendments to information provided at registration or in the protocol. | Na |
| Support | 25 | Describe sources of financial or non-financial support for the review, and the role of the funders or sponsors in the review. | Title page |
| Competing interests | 26 | Declare any competing interests of review authors. | Title page |
| Availability of data, code and other materials | 27 | Report which of the following are publicly available and where they can be found: template data collection forms; data extracted from included studies; data used for all analyses; analytic code; any other materials used in the review. | P11 SI Fig 10 |

*From:*  Page MJ, McKenzie JE, Bossuyt PM, Boutron I, Hoffmann TC, Mulrow CD, et al. The PRISMA 2020 statement: an updated guideline for reporting systematic reviews. BMJ 2021;372:n71. doi: 10.1136/bmj.n71

**Supplementary Information Table 2.** Excluded trials or treatment arms.

| **Reference** | **Types of PPI (OME vs control)** | **Reason excluded** |
| --- | --- | --- |
| Carlsson 1998 | OME vs no control | 2 arms excluded (erosive ERD arms had no controls with erosive disease) |
| Jaspersen D 1998 | OME vs PAN vs LAN | Secondary prevention of remissions, pilot, no common outcome |
| Khuroo MS 1997 | OME vs placebo | outcome bleeding ulcers, no common outcome |
| Lau JYW 2000 | OME vs placebo | outcome recurrent bleeding ulcers, no common outcome |
| Lin HJ 2006 | IV OME vs PAN | Measurement of pH assay-pilot |
| Noordzij 2001 | OME vs placebo | Outcome was symptom score-not common outcome to other RCTs |
| Röhss K 2004 | OME vs ESO/LAN/PAN/RAB | No quantitative data reported |
| Wang L 2011 | OME and ILA | Phase 2 dose study of ILA |

**Abbreviations**: IV, intravenous; ESO, esomeprazole, OME, Omeprazole; ILA, ilaprazole; LAN, lansoprazole; PAN, pantoprazole; PPI, proton pump inhibitor; RAB, rabeprazole.

Carlsson R. Gastroesophageal reflux disease. A study of pathophysiology, clinical diagnosis and management. Euro J Gastroenterol Hepatol. 1998;10(2):119-124.

Jaspersen D, Diehl KL, Schoeppner H, Geyer P, Martens E. A comparison of omeprazole, lansoprazole and pantoprazole in the maintenance treatment of severe reflux oesophagitis. Alimentary pharmacology & therapeutics. 1998 Jan 1;12(1):49-52.

Khuroo MS, Yattoo GN, Javid G, Khan BA, Shah AA, Gulzar GM, Sodi JS. A comparison of omeprazole and placebo for bleeding peptic ulcer. New England Journal of Medicine. 1997 Apr 10;336(15):1054-8.

Lau JY, Sung JJ, Lee KK, Yung MY, Wong SK, Wu JC, Chan FK, Ng EK, You JH, Lee CW, Chan AC. Effect of intravenous omeprazole on recurrent bleeding after endoscopic treatment of bleeding peptic ulcers. New England Journal of Medicine. 2000 Aug 3;343(5):310-6.

Lin HJ, Lo WC, Cheng YC, Perng CL. Effects of 3-day IV pantoprazole versus omeprazole on 24-hour intragastric acidity at 3 days in Chinese patients with duodenal ulcer: A single-center, prospective, randomized, comparative, pilot trial. Clinical therapeutics. 2006 Sep 1;28(9):1303-7.

Noordzij JP, Khidr A, Evans BA, Desper E, Mittal RK, Reibel JF, Levine PA. Evaluation of omeprazole in the treatment of reflux laryngitis: a prospective, placebo‐controlled, randomized, double‐blind study. The Laryngoscope. 2001 Dec;111(12):2147-51.

Röhss K, Lind T, Wilder-Smith C. Esomeprazole 40 mg provides more effective intragastric acid control than lansoprazole 30 mg, omeprazole 20 mg, pantoprazole 40 mg and rabeprazole 20 mg in patients with gastro-oesophageal reflux symptoms. European journal of clinical pharmacology. 2004 Oct;60:531-9.

Wang L, Zhou L, Lin S, Hu H, Xia J. A new PPI, ilaprazole compared with omeprazole in the treatment of duodenal ulcer: a randomized double-blind multicenter trial. Journal of clinical gastroenterology. 2011 Apr 1;45(4):322-9.

**Supplementary Information Table 3**. Frequency of heartburn healing in included trials*****

| **#** | **Reference** | **Type APD** | **Omeprazole:  No. patients with no heartburn** | **Omeprazole: No. patients heartburn not better** | **Type of Control** | **Control:  No. patients with no heartburn** | **Control:  No. patients heartburn not better** |
| --- | --- | --- | --- | --- | --- | --- | --- |
| 1a | Armstrong 2004a | NERD | 686 | 428 | ESO20 | 464 | 295 |
| 1b | Armstrong 2004b | NERD | 686 | 428 | ESO40 | 485 | 287 |
| 2 | Bardhan 2001 | EO | 140 | 21 | PAN20 | 138 | 28 |
| 3 | Bate 1996 | NERD | 69 | 29 | Placebo | 27 | 84 |
| 4a | Carlsson 1998-10mgO | NERD | 55 | 31 | Placebo | 28 | 60 |
| 4b | Carlsson 1998-20mgO | NERD | 54 | 33 | Placebo | 28 | 60 |
| 5a | Catalano 1999-40mgP | DU |  |  |  |  |  |
| 5b | Catalano 1999-80mgP | DU |  |  |  |  |  |
| 6 | Catalano 2000 | DU |  |  |  |  |  |
| 7 | Chang 1995 | DU |  |  |  |  |  |
| 8 | Chen C 2017 | DU |  |  |  |  |  |
| 9 | Chen S 2017 | DU |  |  |  |  |  |
| 10 | Dekkers C 1999 | EO | 27 | 75 | RAB20 | 29 | 69 |
| 11 | Ekstrom 1995 | DU |  |  |  |  |  |
| 12a | Ho K 2009-5mgI | DU/GU |  |  |  |  |  |
| 12b | Ho 2009-10mgI | DU/GU |  |  |  |  |  |
| 13 | Huang 2010 | DU |  |  |  |  |  |
| 14a | Kahrilas 2000-20mgE | EO | 357 | 267 | ESO20 | 382 | 244 |
| 14b | Kahrilas 2000-40mgE | EO | 357 | 267 | ESO40 | 402 | 219 |
| 15 | Li 2010 | DU/GU |  |  |  |  |  |
| 16 | Liao 2015 | DU |  |  |  |  |  |
| 17a | Lind 1997-10mgO | NERD | 62 | 137 | Placebo | 14 | 91 |
| 17b | Lind 1997-20mgO | NERD | 95 | 110 | Placebo | 14 | 91 |

**Supplementary Information Table 3.** Heartburn healing continues

| **#** | **Reference** | **Type APD** | **Omeprazole:  No. patients with no heartburn** | **Omeprazole: No. patients heartburn not better** | **Type of Control** | **Control:  No. patients with no heartburn** | **Control:  No. patients heartburn not better** |
| --- | --- | --- | --- | --- | --- | --- | --- |
| 18 | Mossner 1995 | EO | 74 | 12 | PAN40 | 141 | 28 |
| 19 | Pei 1995 | DU | 34 | 0 | LAN30 | 37 | 1 |
| 20 | Petite 1993 | DU |  |  |  |  |  |
| 21 | Rehner 1995 | DU |  |  |  |  |  |
| 22a | Richter 2000-10mgO | NERD | 58 | 60 | Placebo | 28 | 95 |
| 22b | Richter 2000-20mgO | NERD | 87 | 31 | Placebo | 28 | 95 |
| 23a | Uemura 2008-10mgO | NERD | 31 | 65 | Placebo | 11 | 81 |
| 23b | Uemura 2008-20mgO | NERD | 24 | 69 | Placebo | 11 | 81 |
| 24 | Wang L 2012 | DU | 139 | 5 | ILA10 | 285 | 13 |
| 25 | Watson 1997 | NERD | nr |  | Placebo |  |  |
| 26 | Xiao 1997 | DU/GU | 49 | 12 | LAN30 | 62 | 15 |
| 27 | Xu 2006 | DU | 34 | 0 | RAB20 | 34 | 0 |
| 28 | You QX 2006 | DU |  |  |  |  |  |
| 29 | Zhao 2013 | DU |  |  |  |  |  |
| 30a | Zheng 2009-30mgL | EO | nr |  |  |  |  |
| 30b | Zheng 2009-40mgP | EO | nr |  |  |  |  |
| 30c | Zheng 2009-40mgE | EO | nr |  |  |  |  |
| 31 | Zou 2012 | DU |  |  |  |  |  |

*blank cells indicates trial did not report this outcome

**Abbreviations:** APD, acid/peptic disorders; DU, duodenal ulcer; EO, erosive oesophagitis; ESO, esomeprazole; GU, gastric ulcer; ILA, ilaprazole; LAN, lansoprazole; NERD, Non-erosive reflux disease; No., number**;** nr, not reported; OME, omeprazole; PAN, pantoprazole; PU, peptic ulcer; RAB, rabeprazole.

**Supplementary Information Table 4.** Improvement in all symptoms as outcome in patients with non-erosive NERD.

| **#** | **Reference** | **Omeprazole: No. patients with symptoms improved** | **Omeprazole: No. patients with no symptom improvement** | **Control** | **Control: No. patients with symptoms improved** | **Control: No. patients with no symptom improvement** |
| --- | --- | --- | --- | --- | --- | --- |
| 1a | Armstrong 2004a | 686 | 428 | ESO20 | 464 | 295 |
| 1b | Armstrong 2004b | 686 | 428 | ESO40 | 485 | 287 |
| 2 | Bardhan 2001 | 135 | 26 | PAN20 | 128 | 38 |
| 3 | Bate 1996 |  |  |  |  |  |
| 4a | Carlsson 1998-10mgO | 27 | 59 | Placebo | 17 | 71 |
| 4b | Carlsson 1998-20mgO | 25 | 62 | Placebo | 17 | 71 |
| 5a | Catalano 1999-40mgP |  |  |  |  |  |
| 5b | Catalano 1999-80mgP |  |  |  |  |  |
| 6 | Catalano 2000 |  |  |  |  |  |
| 7 | Chang 1995 |  |  |  |  |  |
| 8 | Chen C 2017 |  |  |  |  |  |
| 9 | Chen S 2017 |  |  |  |  |  |
| 10 | Dekkers C 1999 |  |  |  |  |  |
| 11 | Ekstrom 1995 |  |  |  |  |  |
| 12a | Ho K 2009-5mgI |  |  |  |  |  |
| 12b | Ho 2009-10mgI |  |  |  |  |  |
| 13 | Huang 2010 |  |  |  |  |  |
| 14a | Kahrilas 2000-20mgE | 357 | 267 | ESO20 | 382 | 244 |
| 14b | Kahrilas 2000-40mgE | 357 | 267 | ESO40 | 402 | 219 |
| 15 | Li 2010 |  |  |  |  |  |
| 16 | Liao 2015 |  |  |  |  |  |
| 17a | Lind 1997-10mgO |  |  |  |  |  |
| 17b | Lind 1997-20mgO |  |  |  |  |  |

**Supplementary Information Table 4.** Improvement in all symptoms outcome in patients with non-erosive NERD- continued

| **#** | **Reference** | **Omeprazole: No. patients with symptoms improved** | **Omeprazole: No. patients with no symptom improvement** | **Control** | **Control: No. patients with symptoms improved** | **Control: No. patients with no symptom improvement** |
| --- | --- | --- | --- | --- | --- | --- |
| 18 | Mossner 1995 |  |  |  |  |  |
| 19 | Pei 1995 |  |  |  |  |  |
| 20 | Petite 1993 |  |  |  |  |  |
| 21 | Rehner 1995 |  |  |  |  |  |
| 22a | Richter 2000010mgO |  |  |  |  |  |
| 22b | Richter 2000-20mgo |  |  |  |  |  |
| 23a | Uemura 2008-10mgO |  |  |  |  |  |
| 23b | Uemura 2008-20mgO |  |  |  |  |  |
| 24 | Wang L 2012 | 139 | 5 | ILA10 | 285 | 13 |
| 25 | Watson 1997 | 12 | 6 | Placebo | 1 | 17 |
| 26 | Xiao 1997 |  |  |  |  |  |
| 27 | Xu 2006 |  |  |  |  |  |
| 28 | You QX 2006 |  |  |  |  |  |
| 29 | Zhao 2013 |  |  |  |  |  |
| 30a | Zheng 2009-30mgL |  |  |  |  |  |
| 30b | Zheng 2009-40mgP |  |  |  |  |  |
| 30c | Zheng 2009-40mgE |  |  |  |  |  |
| 31 | Zou 2012 |  |  |  |  |  |

Note: blank cells indicates trial did not report this outcome

**Abbreviations**: DU, duodenal ulcer; EO, erosive oesophagitis; ESO, esomeprazole; GU, gastric ulcer; ILA, ilaprazole; LAN, lansoprazole; NERD, Non-erosive reflux disease; Nr, not reported in paper; OME, omeprazole; PAN, pantoprazole; PU, peptic ulcer; RAB, rabeprazole.

**Supplementary Information Table 5.** Outcomes for ulcer healing in patients with erosive ulcers and erosion healing for patients with erosive oesophagitis.

| **#** | **Reference** | **Type of APD** | **Omeprazole: No. patients with ulcer or erosion healed** | **Omeprazole: No. patients not healed** | **Type of Control** | **Control: No. of patients with ulcer or erosion healed** | **Control: No. of patients not healed** |
| --- | --- | --- | --- | --- | --- | --- | --- |
| 1a | Armstrong 2004a | NERD |  |  |  |  |  |
| 1b | Armstrong 2004b | - |  |  |  |  |  |
| 2 | Bardhan 2001 | EO | 135 | 26 | PAN20 | 128 | 38 |
| 3 | Bate 1996 | NERD |  |  |  |  |  |
| 4a | Carlsson 1998-10mgO | NERD |  |  |  |  |  |
| 4b | Carlsson 1998-20mgO | - |  |  |  |  |  |
| 5a | Catalano 1999-40mgP | DU | 81 | 3 | PAN40 | 66 | 13 |
| 5b | Catalano 1999-80mgP | - | 81 | 3 | PAN 80 | 77 | 3 |
| 6 | Catalano 2000 | DU | 78 | 10 | PAN80 | 70 | 14 |
| 7 | Chang 1995 | DU | 45 | 9 | LAN30 | 51 | 6 |
| 8 | Chen C 2017 | DU | 19 | 21 | ILA10 | 31 | 9 |
| 9 | Chen S 2017 | DU | 25 | 5 | PAN40 | 27 | 3 |
| 10 | Dekkers C 1999 | EO | 83 | 19 | RAB20 | 81 | 19 |
| 11 | Ekstrom 1995 | DU | 128 | 5 | LAN30 | 136 | 4 |
| 12a | Ho K 2009-5mgI | DU/GU | 127 | 47 | ILA5 | 134 | 40 |
| 12b | Ho 2009-10mgI | - | 127 | 47 | ILA10 | 123 | 47 |
| 13 | Huang 2010 | DU | 42 | 18 | PAN40 | 44 | 16 |
| 14a | Kahrilas 2000-20mgE | EO | 404 | 220 | ESO20 | 441 | 185 |
| 14b | Kahrilas 2000-40mgE | EO | 404 | 220 | ESO40 | 471 | 150 |
| 15 | Li 2010 | DU/PU | 46 | 4 | PAN40 | 46 | 4 |
| 16 | Liao 2015 | DU | 36 | 4 | ILA10 | 37 | 3 |
| 17a | Lind 1997-10mgO | NERD |  |  |  |  |  |
| 17b | Lind 1997-20mgO | - |  |  |  |  |  |

**Supplementary Information Table 5.** Outcomes for ulcer or erosion healing - continued.

| **#** | **Reference** | **Type of APD** | **Omeprazole: No. patients with ulcer or erosion healed** | **Omeprazole: No. patients not healed** | **Control** | **Control: No. of patients with ulcer or erosion healed** | **Control: No. of patients not healed** |
| --- | --- | --- | --- | --- | --- | --- | --- |
| 18 | Mossner 1995 | EO | 67 | 19 | PAN40 | 126 | 44 |
| 19 | Pei 1995 | DU | 31 | 3 | LAN30 | 37 | 1 |
| 20 | Petite 1993 | DU | 39 | 32 | LAN30 | 52 | 21 |
| 21 | Rehner 1995 | DU | 67 | 26 | PAN40 | 131 | 62 |
| 22a | Richter 2000-10mgO | NERD |  |  |  |  |  |
| 22b | Richter 2000-20mgO | - |  |  |  |  |  |
| 23a | Uemura 2008-10mgO | NERD |  |  |  |  |  |
| 23b | Uemura 2008-20mgO | - |  |  |  |  |  |
| 24 | Wang L 2012 | DU | 149 | 15 | ILA10 | 307 | 23 |
| 25 | Watson 1997 | NERD |  |  |  |  |  |
| 26 | Xiao 1997 | GU/DU | 54 | 7 | LAN30 | 72 | 5 |
| 27 | Xu 2006 | DU | 33 | 1 | RAB20 | 32 | 2 |
| 28 | You QX 2006 | DU | 34 | 2 | RAB20 | 38 | 2 |
| 29 | Zhao 2013 | DU | 34 | 2 | PAN40 | 36 | 4 |
| 30a | Zheng 2009-30mgL | EO | 57 | 8 | PAN40 | 61 | 6 |
| 30b | Zheng 2009-40mgP | - | 57 | 8 | LAN30 | 60 | 7 |
| 30c | Zheng 2009-40mgE | - | 57 | 8 | ESO40 | 62 | 3 |
| 31 | Zou 2012 | DU | 17 | 3 | PAN40 | 18 | 2 |

**Notes**: blank cells indicates trial did not report this outcome; Ulcer healed=reported as ulcer healed or (‘healed/cured’ + ‘apparent/markedly effective’, standardized so ulcer was healed with or without inflammation. Does not include ‘improved’ or ulcer size reduced by >50%.

**Abbreviations**: APD, Acid/peptic disorders; DU, duodenal ulcer; EO, erosive oesophagitis; ESO, esomeprazole; GU, gastric ulcer; ILA, ilaprazole; LAN, lansoprazole; NERD, Non-erosive reflux disease; Nr, not reported in paper; OME, omeprazole; PAN, pantoprazole; PU, peptic ulcer; RAB, rabeprazole.

**Supplementary Information Table 6**. Definitions for ulcer healing in included trials

| **#** | **Reference** | **Overall healing outcome used with definition** | **Healing outcome categorized into different levels** | | | | | |
| --- | --- | --- | --- | --- | --- | --- | --- | --- |
| **Level A: Ulcer healed and no inflammation** | **Level B: Ulcer healed but still inflammation** | **Level C: Ulcer size less by :50%** | **Level D: no change or size<50%** | **“Healing Rate” [A+B}** | **“Total effective rate” [A+B+C]** |
| 1 | Armstrong 2004 |  |  |  |  |  |  |  |
| 2 | Bardhan 2001 | epithelium healed |  |  |  |  |  |  |
| 3 | Bate 1996 |  |  |  |  |  |  |  |
| 4 | Carlsson 1998 |  |  |  |  |  |  |  |
| 5 | Catalano 1999 | healed |  |  |  |  |  |  |
| 6 | Catalano 2000 | healed |  |  |  |  |  |  |
| 7 | Chang 1995 | no ulcer crater |  |  |  |  |  |  |
| 8 | Chen C 2017 |  | cured | markedly effective | effective | ineffective | X | X |
| 9 | Chen S 2017 |  | cured | markedly effective | effective | invalid | X | X |
| 10 | Dekkers C 1999 | healed erosion |  |  |  |  |  |  |
| 11 | Ekstrom 1995 | healed |  |  |  |  |  |  |
| 12 | Ho K 2009 | just scar |  |  |  |  |  |  |
| 13 | Huang 2010 |  | healing | apparent effect | effective | ineffective | X | X |
| 14 | Kahrilas 2000 | no mucosal break |  |  |  |  |  |  |
| 15 | Li 2010 |  | healing | marked effect | effective | invalid | X | X |
| 16 | Liao 2015 |  | cured | healing | effective | invalid | X | X |
| 17 | Lind 1997- |  |  |  |  |  |  |  |

**Supplementary Information Table 6 continues**

| **#** | **Reference** | **Overall healing outcome used with definition** | **Healing outcome categorized into different levels** | | | | | |
| --- | --- | --- | --- | --- | --- | --- | --- | --- |
| **Level A: Ulcer healed and no inflammation** | **Level B: Ulcer healed but still inflammation** | **Level C: Ulcer size less by :50%** | **Level D: no change or size<50%** | **“Healing Rate” [A+B}** | **“Total effective rate” [A+B+C]** |
| 18 | Mossner 1995 | re-epithelization |  |  |  |  |  |  |
| 19 | Pei 1995 |  | recovered/completely healed | significant/basic healed | effective/partial healing | ineffective | X | X |
| 20 | Petite 1993 | no ulcer crater |  |  |  |  |  |  |
| 21 | Rehner 1995 | healed ulcer |  |  |  |  |  |  |
| 22 | Richter 2000 |  |  |  |  |  |  |  |
| 23 | Uemura 2008 |  |  |  |  |  |  |  |
| 24 | Wang L 2012 | scarring only |  |  |  |  |  |  |
| 25 | Watson 1997 |  |  |  |  |  |  |  |
| 26 | Xiao 1997 |  | combination | apparent/marked effect | effective | ineffective | X | X |
| 27 | Xu 2006 |  | healed | healed | improved | invalid | X | X |
| 28 | You QX 2006 |  | completely healed | basic healing | effective | ineffective | X | X |
| 29 | Zhao 2013 |  | completely healed (C) | basic healing (S) | effective (P) | ineffective (N) | C+S | C+S+P |
| 30 | Zheng 2009 | erosion healed |  |  |  |  |  |  |
| 31 | Zou 2012 |  | healing | significantly effective | effective | no change | X | X |

Note: blank cells indicates trial did not report this outcome

**Supplementary Information Table 7.** Other reported outcomes in included trials

|  |  | **Primary outcomes** | | | | **Secondary outcomes** | | | | **Subgroups** | |
| --- | --- | --- | --- | --- | --- | --- | --- | --- | --- | --- | --- |
| **#** | **Reference** | **pH>4 over 24 hrs** | **Symptom score** | **Dysphagia or ulcer pain** | **All symptoms improved** | **Symptoms resolved during treatment time** | **Patient satisfaction** | **Noctural acid** | **Use of  rescue meds** | **Hp+ eradication** | **Anxiety** |
| 1 | Armstrong 2004 |  |  | yes | yes | yes (wk 2 & 4) | yes | yes |  |  |  |
| 2 | Bardhan 2001 |  |  | yes | yes |  |  |  |  |  |  |
| 3 | Bate 1996 |  |  | yes |  | yes (median) |  | yes | yes |  | yes |
| 4 | Carlsson 1998 |  | Fig 2 only | yes | yes |  |  |  | yes |  |  |
| 5 | Catalano 1999 |  |  |  |  |  |  |  |  | yes |  |
| 6 | Catalano 2000 |  |  |  |  |  |  |  |  | yes |  |
| 7 | Chang 1995 |  |  | yes |  |  |  |  | yes |  |  |
| 8 | Chen C 2017 |  |  |  |  |  |  |  |  |  |  |
| 9 | Chen S 2017 |  |  |  |  | yes (wk 2 &6) |  |  |  |  |  |
| 10 | Dekkers C 1999 |  |  |  |  | yes (wk 4 & 8) |  | yes |  |  |  |
| 11 | Ekstrom 1995 |  |  | yes |  | yes (wk 2 & 4) |  |  | yes |  |  |
| 12 | Ho K 2009 |  |  | yes |  |  |  |  |  | yes |  |
| 13 | Huang 2010 |  |  |  |  | yes (mean) |  |  |  |  |  |
| 14 | Kahrilas 2000 |  |  |  | yes | yes (median) |  | yes |  |  |  |
| 15 | Li 2010 |  |  |  |  |  |  |  |  |  |  |
| 16 | Liao 2015 |  |  |  |  |  |  |  |  |  |  |
| 17 | Lind 1997a | Fig 2 only |  |  |  |  | yes |  |  |  |  |

**Supplementary Information Table 7.** Other reported outcomes continued

|  |  | **Primary outcomes** | | | | **Secondary outcomes** | | | | **Subgroups** | |
| --- | --- | --- | --- | --- | --- | --- | --- | --- | --- | --- | --- |
| **#** | **Reference** | **pH>4 over 24 hrs** | **Symptom score** | **Dysphagia or ulcer pain** | **All symptoms improved** | **Frequency symptoms resolved during treatment time** | **Patient satisfaction** | **Noctural acid** | **Use of rescue meds** | **Hp+ eradication-** | **Anxiety** |
| 18 | Mossner 1995 |  |  | yes |  | yes (wk 2 & 4) |  |  |  |  |  |
| 19 | Pei 1995 |  |  | yes |  | yes (by day 3) |  |  |  |  |  |
| 20 | Petite 1993 |  |  | yes |  | yes (wk 2 & 4, median) |  |  | yes |  |  |
| 21 | Rehner 1995 |  |  | yes |  |  |  |  |  |  |  |
| 22 | Richter 2000 |  |  | yes |  | yes (by day 4-6) |  |  |  |  |  |
| 23 | Uemura 2008 |  |  |  |  |  |  |  |  |  |  |
| 24 | Wang L 2012 |  |  | yes | yes | yes (wk 2 & 4, median) |  |  |  | yes |  |
| 25 | Watson 1997 |  |  |  | yes |  |  |  |  |  |  |
| 26 | Xiao 1997 |  |  | yes |  |  |  |  |  |  |  |
| 27 | Xu 2006 |  |  | yes |  | yes (wk 1 & 4) |  |  |  |  |  |
| 28 | You QX 2006 |  |  |  |  |  |  |  |  |  |  |
| 29 | Zhao 2013 |  |  | yes |  | yes (by day 3) |  |  |  |  |  |
| 30 | Zheng 2009 |  |  |  |  |  |  |  |  |  |  |
| 31 | Zou 2012 |  |  |  |  |  |  |  |  |  |  |

Note: blank cells indicates trial did not report this outcome

**Abbreviations:** Hp, *Helicobacter pylori*; QoL, quality of life.

**Supplementary Information Table 8**. Frequency of adverse event reporting in included trials

| **#** | **Reference** | **Omeprazole  No. patients reporting >1 AEs** | **Omeprazole No. patients with no AEs** | **Type of control** | **Control No. patients reporting >1 AEs** | **Controls No. patients with no AEs** |
| --- | --- | --- | --- | --- | --- | --- |
| 1 | Armstrong 2004a | 0 a | 1114 | ESO20 | 0 | 759 |
|  | Armstrong 2004b | 0 a | 1114 | ESO40 | 0 | 772 |
| 2 | Bardhan 2001 | 80 | 81 | PAN20 | 95 | 71 |
| 3 | Bate 1996 | 49 | 49 | Placebo | 61 | 49 |
| 4 | Carlsson 1998-10mgO | noAEdata |  |  |  |  |
|  | Carlsson 1998-20mgO | noAEdata |  |  |  |  |
| 5 | Catalano 1999-40mgP | no overall AE data |  | PAN40 |  |  |
|  | Catalano 1999-80mgP | no overall AE data |  | PAN80 |  |  |
| 6 | Catalano 2000 | 21 | 67 | PAN80 | 20 | 64 |
| 7 | Chang 1995 | 2 | 52 | LAN30 | 3 | 54 |
| 8 | Chen C 2017 | 3 | 37 | ILA10 | 1 | 39 |
| 9 | Chen S 2017 | NoAEdata |  |  |  |  |
| 10 | Dekkers C 1999 | 29 | 73 | RAB20 | 32 | 68 |
| 11 | Ekstrom 1995 | 3 | 133 | LAN30 | 6 | 137 |
| 12 | Ho K 2009-5mgI | 23 | 81 | ILA5 | 30 | 74 |
|  | Ho 2009-10mgI | 23 | 81 | ILA10 | 23 | 76 |
| 13 | Huang 2010 | 1 | 59 | PAN40 | 1 | 59 |
| 14 | Kahrilas 2000-20mgE | no overall AE data |  |  |  |  |
|  | Kahrilas 2000-40mgE | no overall AE data |  |  |  |  |
| 15 | Li 2010 | 5 | 45 | PAN40 | 0 | 50 |
| 16 | Liao 2015 | 3 | 37 | ILA10 | 1 | 39 |
| 17 | Lind 1997-10mgO | 3 | 196 | Placebo | 5 | 100 |
|  | Lind 1997-20mgO | 3 | 202 | Placebo | 5 | 100 |

**Supplementary Information Table 8.** AE continues

| **#** | **Reference** | **Omeprazole  No. patients reporting >1 AEs** | **Omeprazole No. patients with no AEs** | **Type of control** | **Control No. patients reporting >1 AEs** | **Controls No. patients with no AEs** |
| --- | --- | --- | --- | --- | --- | --- |
| 18 | Mossner 1995 | 8 | 87 | PAN40 | 23 | 168 |
| 19 | Pei 1995 | noAE data |  |  |  |  |
| 20 | Petite 1993 | 9 | 62 | LAN30 | 11 | 62 |
| 21 | Rehner 1995 | 11 | 82 | PAN40 | 18 | 175 |
| 22a | Richter 2000-10mgO | no overall AE data |  |  |  |  |
| 22b | Richter 2000-20mgO | no overall AE data |  |  |  |  |
| 23a | Uemura 2008-10mgO | 21 | 75 | Placebo | 29 | 66 |
| 23b | Uemura 2008-20mgO | 34 | 59 | Placebo | 29 | 66 |
| 24 | Wang L 2012 | 33 | 132 | ILA10 | 48 | 283 |
| 25 | Watson 1997 | no AE data |  |  |  |  |
| 26 | Xiao 1997 | 6 | 55 | LAN30 | 9 | 68 |
| 27 | Xu 2006 | 3 | 31 | RAB20 | 1 | 33 |
| 28 | You QX 2006 | 1 | 35 | RAB20 | 1 | 35 |
| 29 | Zhao 2013 | 5 | 31 | PAN40 | 4 | 36 |
| 30a | Zheng 2009-30mgL | 0 a | 0 | LAN30 | 0 | 0 |
| 30b | Zheng 2009-40mgP | 0 a | 0 | PAN40 | 0 | 0 |
| 30c | Zheng 2009-40mgE | 0 a | 0 | ESO40 | 0 | 0 |
| 31 | Zou 2012 | 2 | 18 | PAN40 | 1 | 19 |

**Note:** blank cells indicates trial did not report this outcome

atrial only reported ‘no adverse events found’

**Abbreviations:** AE, adverse events reported; ESO, esomeprazole; ILA, ilaprazole; LAN, lansoprazole; No., number; OME, omeprazole; PAN, pantoprazole; RAB, rabeprazole.

**Supplementary Information Table 9.** Direct costs of PPI treatments in India based on included trials for patients with Acid Peptic Disorders

| **Type PPI** | **Brand name India** | **Dose (mg) /daya** | **Cost (rupees) per day per patientb** | **Cost (rupees) for 4 week treatment per patient** | **% failed at 4 weeksc** | **Cost (rupees) for additional 4 weeks re-treatment per patient** | **Total cost (rupees) for initial and re-treatment per patient d** |
| --- | --- | --- | --- | --- | --- | --- | --- |
| Omeprazole | Omez | 20 | 3.2 | 89.6 | 23 | 20.6 | 110.2 |
| Esomeprazole | Nexpro | 40 | 10.9 | 305.2 | 30 | 91.6 | 396.8 |
| Pantoprazole | Pantocid | 40 | 11.5 | 322.0 | 31 | 99.8 | 421.8 |
| Ilaprazole | Ilapro | 10 | 16.1 | 450.8 | 13 | 63.1 | 513.9 |
| Rabeprazole | Raz | 20 | 17.8 | 498.4 | 14 | 64.8 | 563.2 |
| Lansoprazole | Lanspro | 30 | 31.3 | 876.4 | 4.5 | 39.4 | 915.8 |

**Abbreviations**: %, percent of patients; PPI, proton-pump inhibitor; IR, Indian rupees

a Only from trials using recommended doses from guidelines

b Costs are in Indian Rupees, taken from Indian website (<https://www.1mg.com/drugs/>)

c Averaged from included trials on specific PPI and doses, assuming additional 4 week treatment needed for ulcer/erosion improvement

d Total cost included costs for initial 4 weeks plus patients needing additional 4 weeks

**Supplementary Information Table 10.** Risk of Bias in included trials.

| **#** | **Reference** | **Randomization process** | **Intervention deviations** | **Missing outcome data** | **Outcome measures** | **Reported outcomes** | **Overall** |
| --- | --- | --- | --- | --- | --- | --- | --- |
| 1 | Armstrong 2004 | Low | Low | High | Low | Low | Low |
| 2 | Bardhan 2001 | Low | Uncertain | Low | Low | Low | Low |
| 3 | Bate 1996 | Low | Low | Low | Low | Low | Low |
| 4 | Carlsson 1998 | Low | Low | Low | Low | Low | Low |
| 5 | Catalano 1999 | Low | Low | Low | Low | Low | Low |
| 6 | Catalano 2000 | Low | Low | Low | Low | Low | Low |
| 7 | Chang 1995 | Low | Low | Low | Low | Low | Low |
| 8 | Chen C 2017 | High | High | Low | Low | Low | High |
| 9 | Chen S 2017 | High | High | Low | Low | Low | High |
| 10 | Dekkers C 1999 | Low | Low | Low | Low | Low | Low |
| 11 | Ekstrom 1995 | Low | Low | Low | Low | Low | Low |
| 12 | Ho K 2009 | Low | Low | Low | Low | Low | Low |
| 13 | Huang 2010 | Low | High | Low | Low | Low | Low |
| 14 | Kahrilas 2000 | Low | Low | Low | Low | Low | Low |
| 15 | Li 2010 | High | High | Low | Low | Low | High |
| 16 | Liao 2015 | High | High | Low | Low | Low | High |
| 17 | Lind 1997 | Low | Low | Low | Low | Low | Low |
| 18 | Mossner 1995 | Low | Low | Low | Low | Low | Low |
| 19 | Pei 1995 | Low | High | Low | Low | Low | Low |
| 20 | Petite 1993 | Low | Low | High | Low | Low | Low |

**Supplementary Information Table 10. Risk of Bias continues**

| **#** | **Reference** | **Randomization process** | **Intervention deviations** | **Missing outcome data** | **Outcome measures** | **Reported outcomes** | **Overall** |
| --- | --- | --- | --- | --- | --- | --- | --- |
| 21 | Rehner 1995 | Low | Low | Low | Low | Low | Low |
| 22 | Richter 2000 | Low | Low | Low | Low | Low | Low |
| 23 | Uemura 2008 | Low | Low | Low | Low | Low | Low |
| 24 | Wang L 2012 | Low | Low | Low | Low | Low | Low |
| 25 | Watson 1997 | Low | Low | Low | Low | Low | Low |
| 26 | Xiao 1997 | High | High | Low | Low | Low | High |
| 27 | Xu 2006 | High | High | Low | Low | Low | High |
| 28 | You QX 2006 | High | High | Low | Low | Low | High |
| 29 | Zhao 2013 | High | High | Low | Low | Low | High |
| 30 | Zheng 2009 | High | High | Low | Low | Low | High |
| 31 | Zou 2012 | High | High | Low | Low | Low | High |


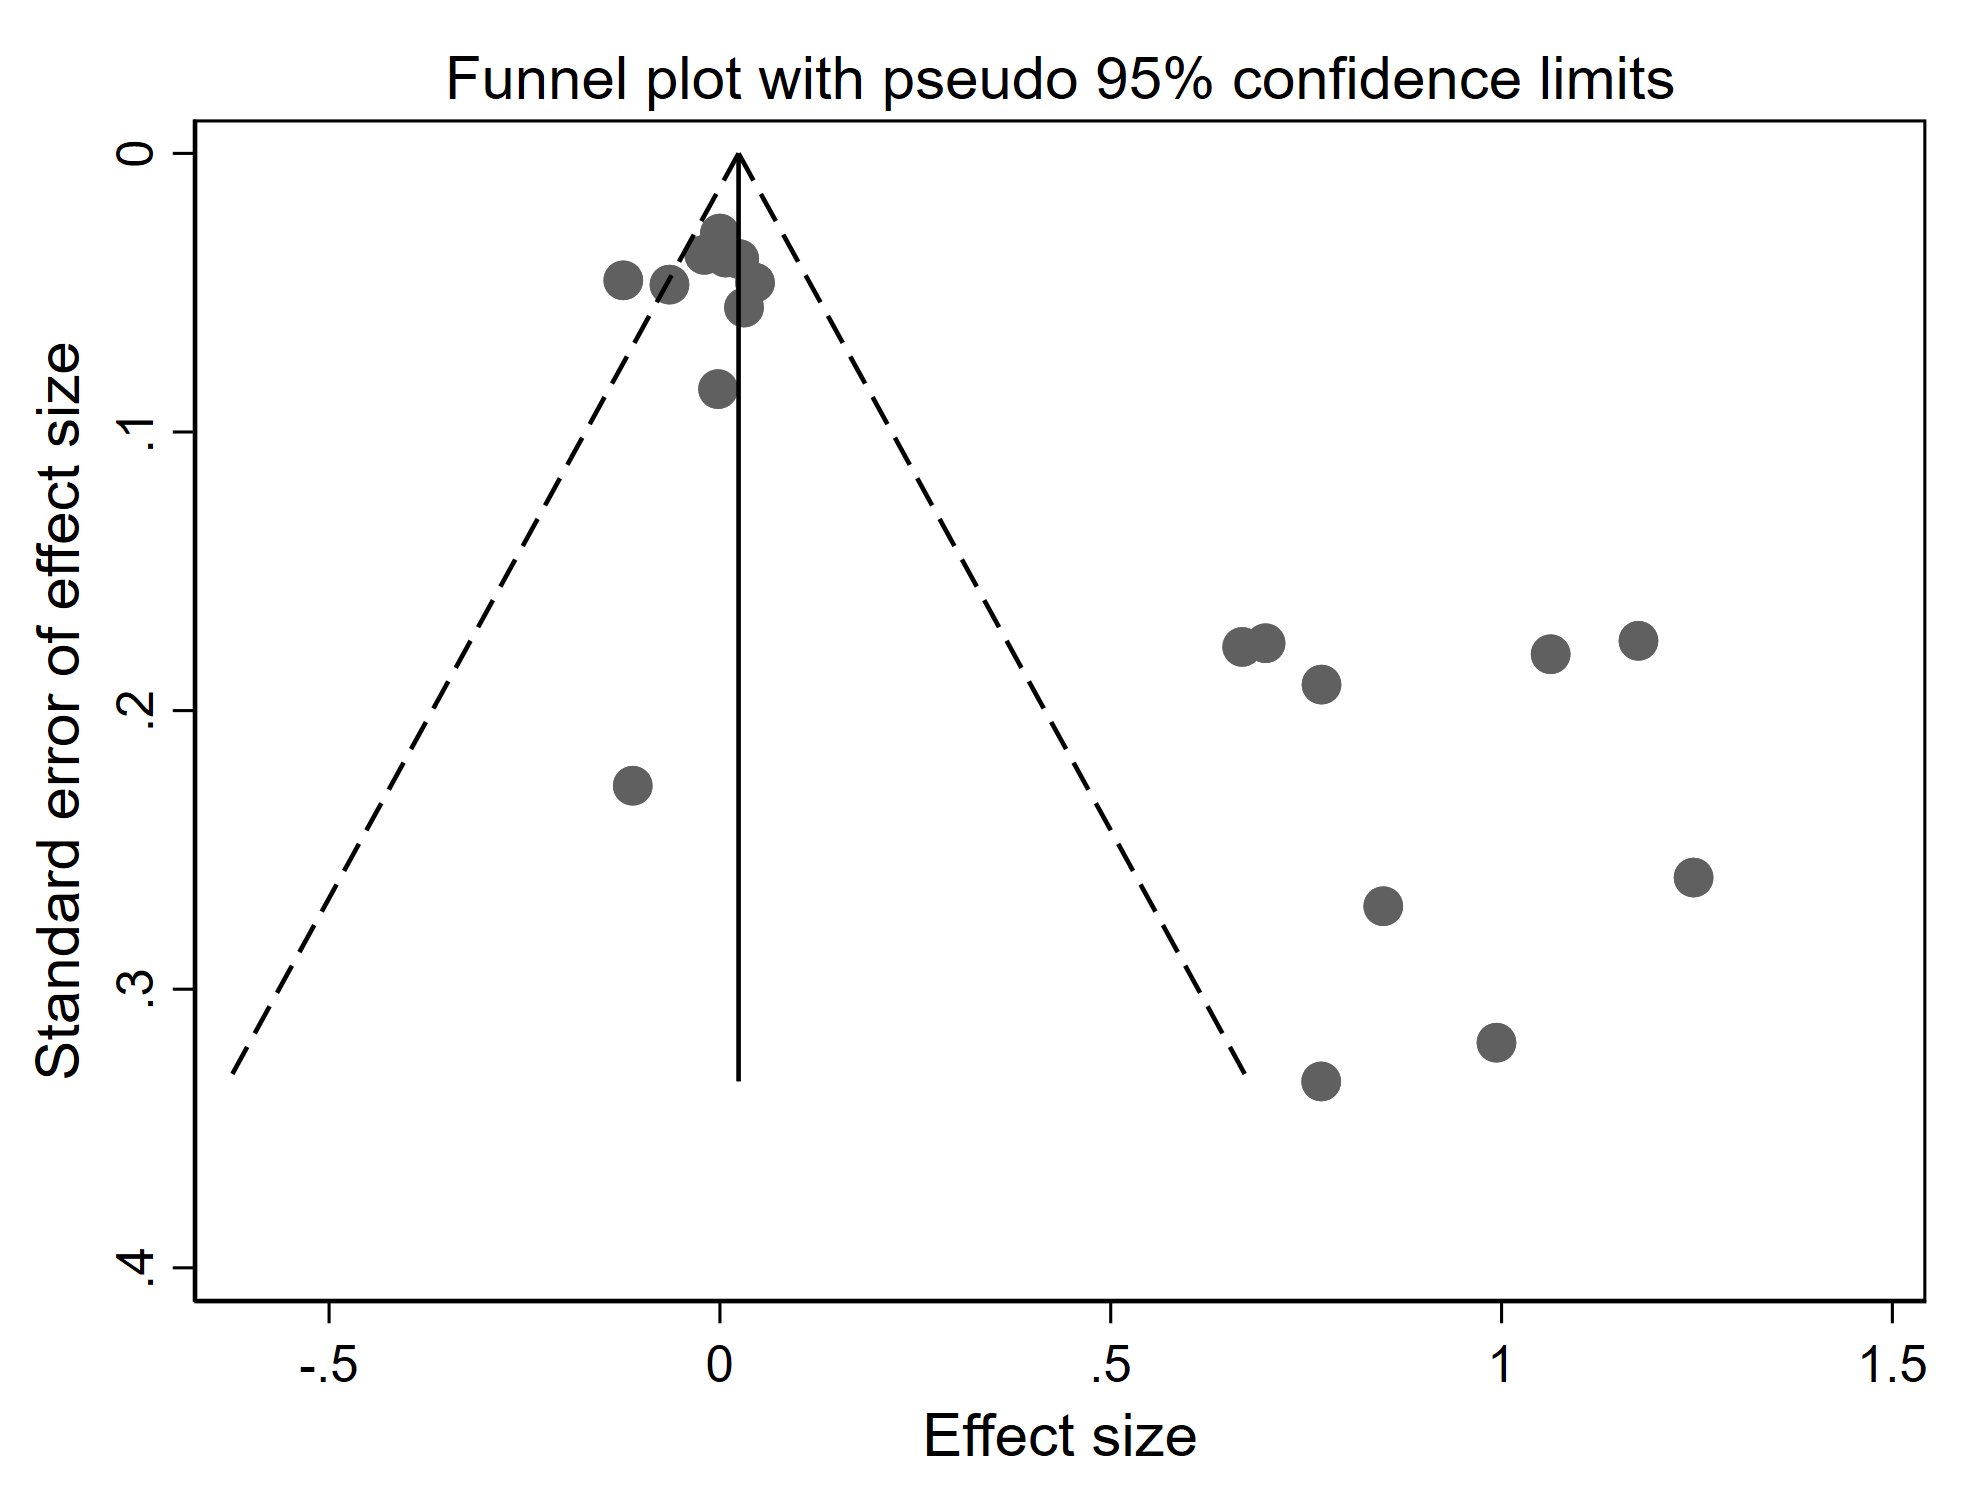


**Supplementary Information Figure 1**. Funnel plot of publication bias for trials with outcome: improvement in heartburn symptoms. Egger’s test (p<0.001) indicates possible bias.


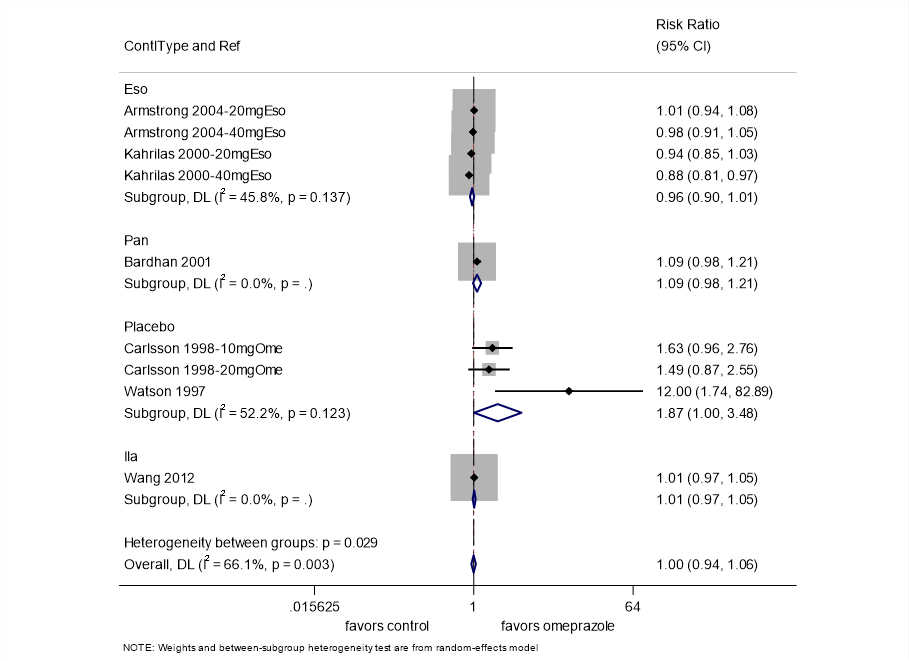


**Supplementary Information Figure 2**. Improved symptoms in NERD patients comparing omeprazole to other controls.

**Abbreviations**: Eso, esomeprazole; Ila, ilaprazole; Pan, pantoprazole.


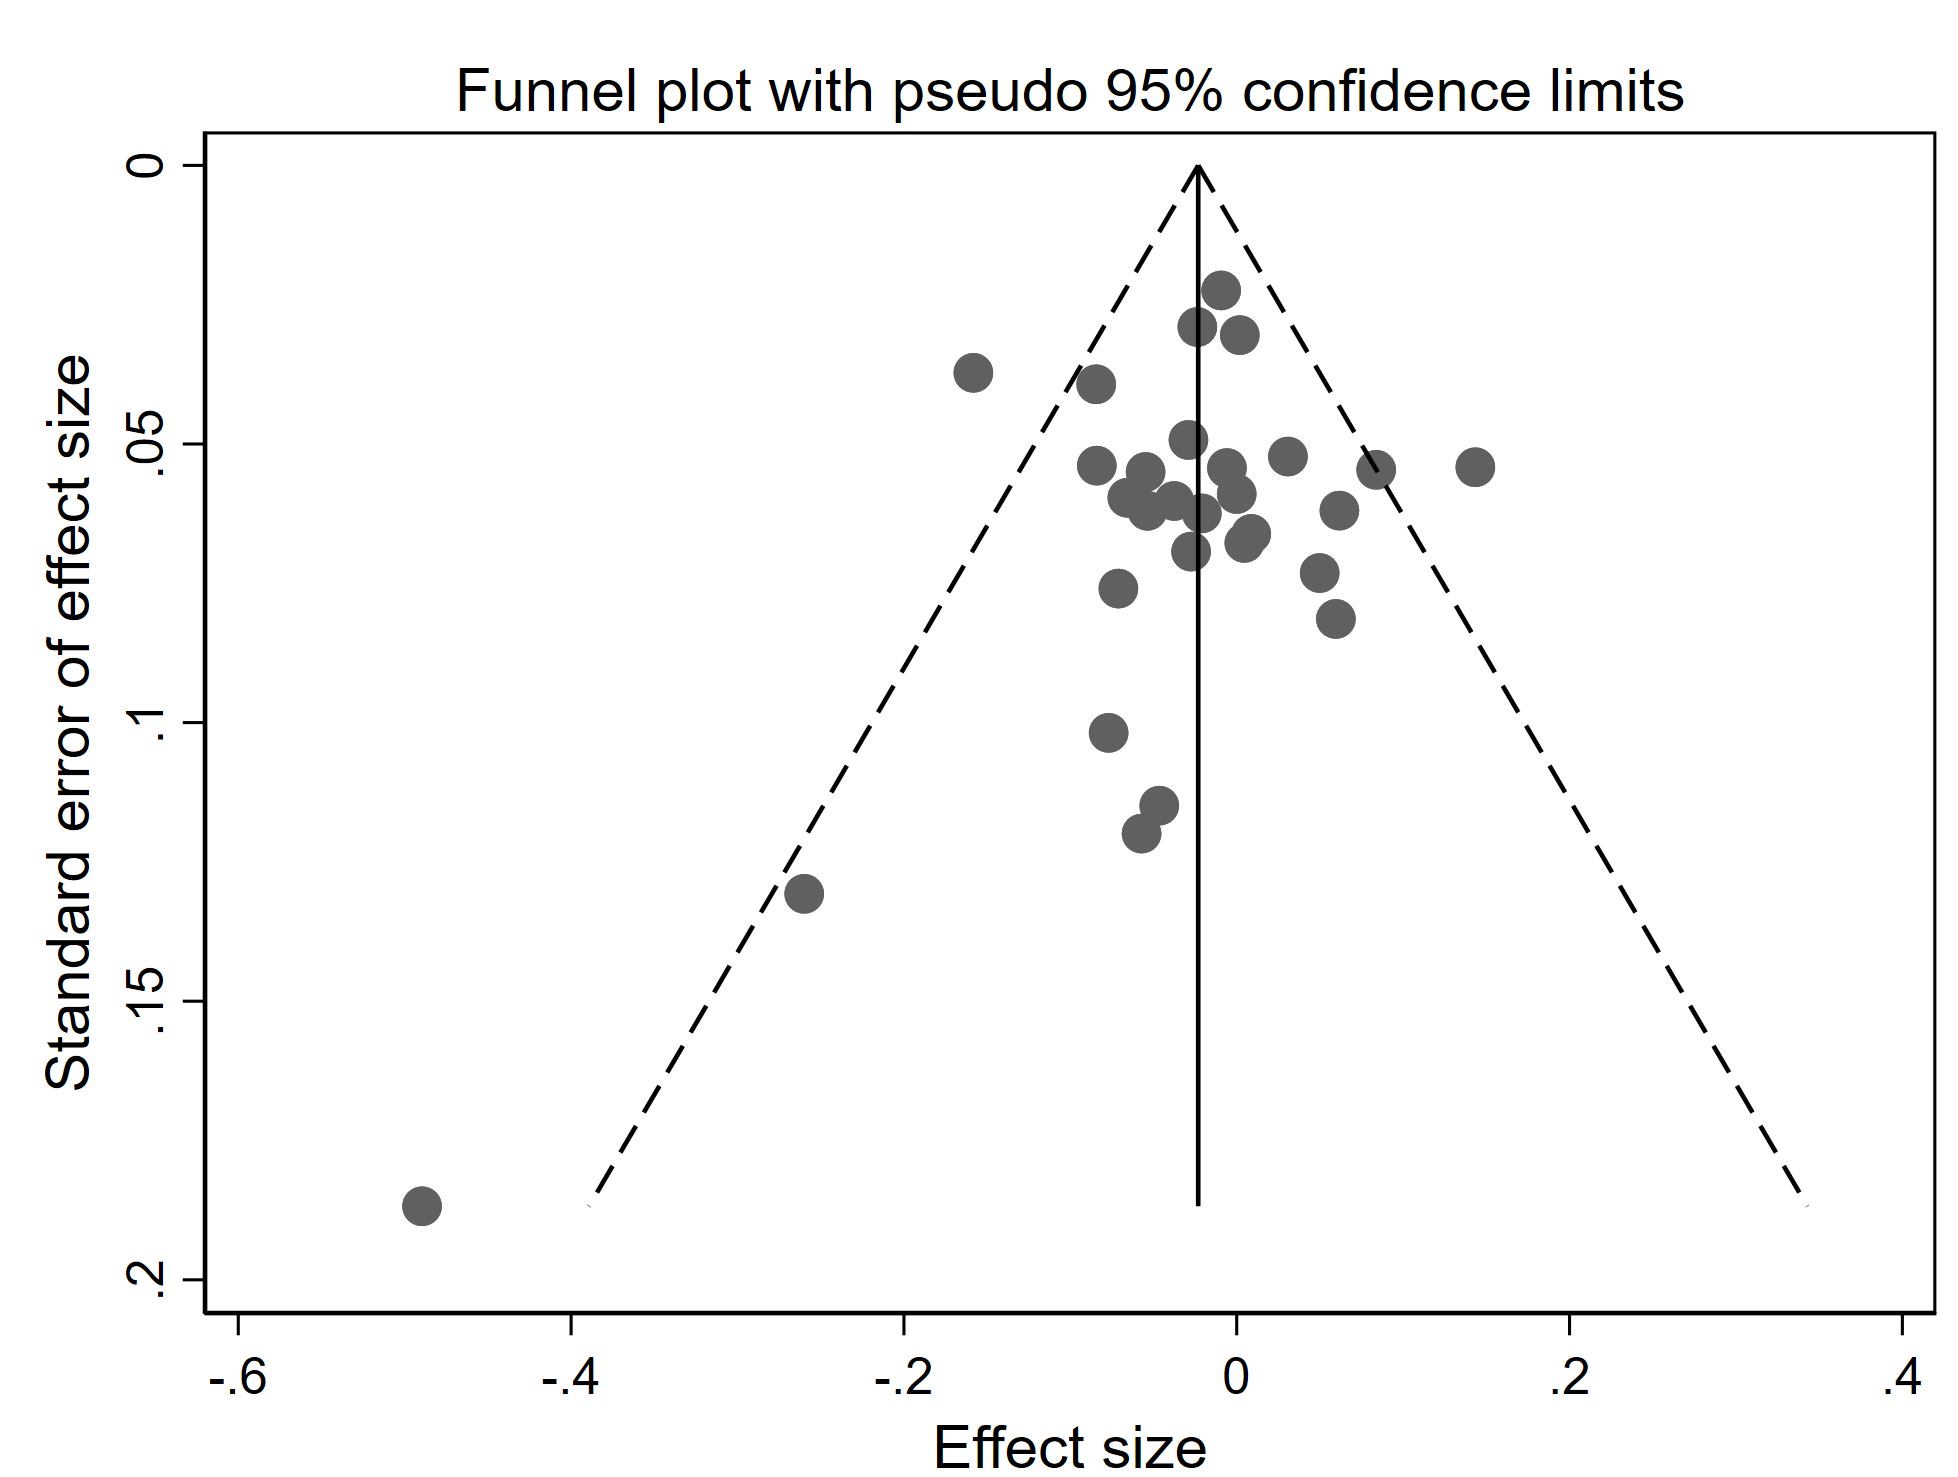


**Supplementary Information Figure 3.** Funnel plot for publication bias of trials with outcome: erosion or ulcer healing. Egger’s test (p=0.52) shows no significant publication bias.

**
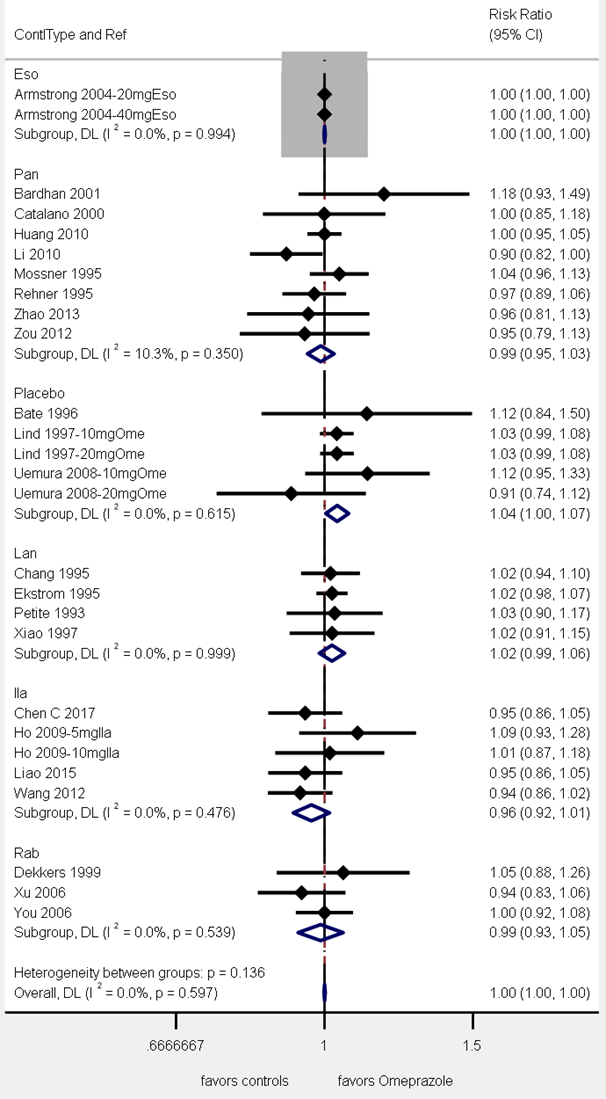
**


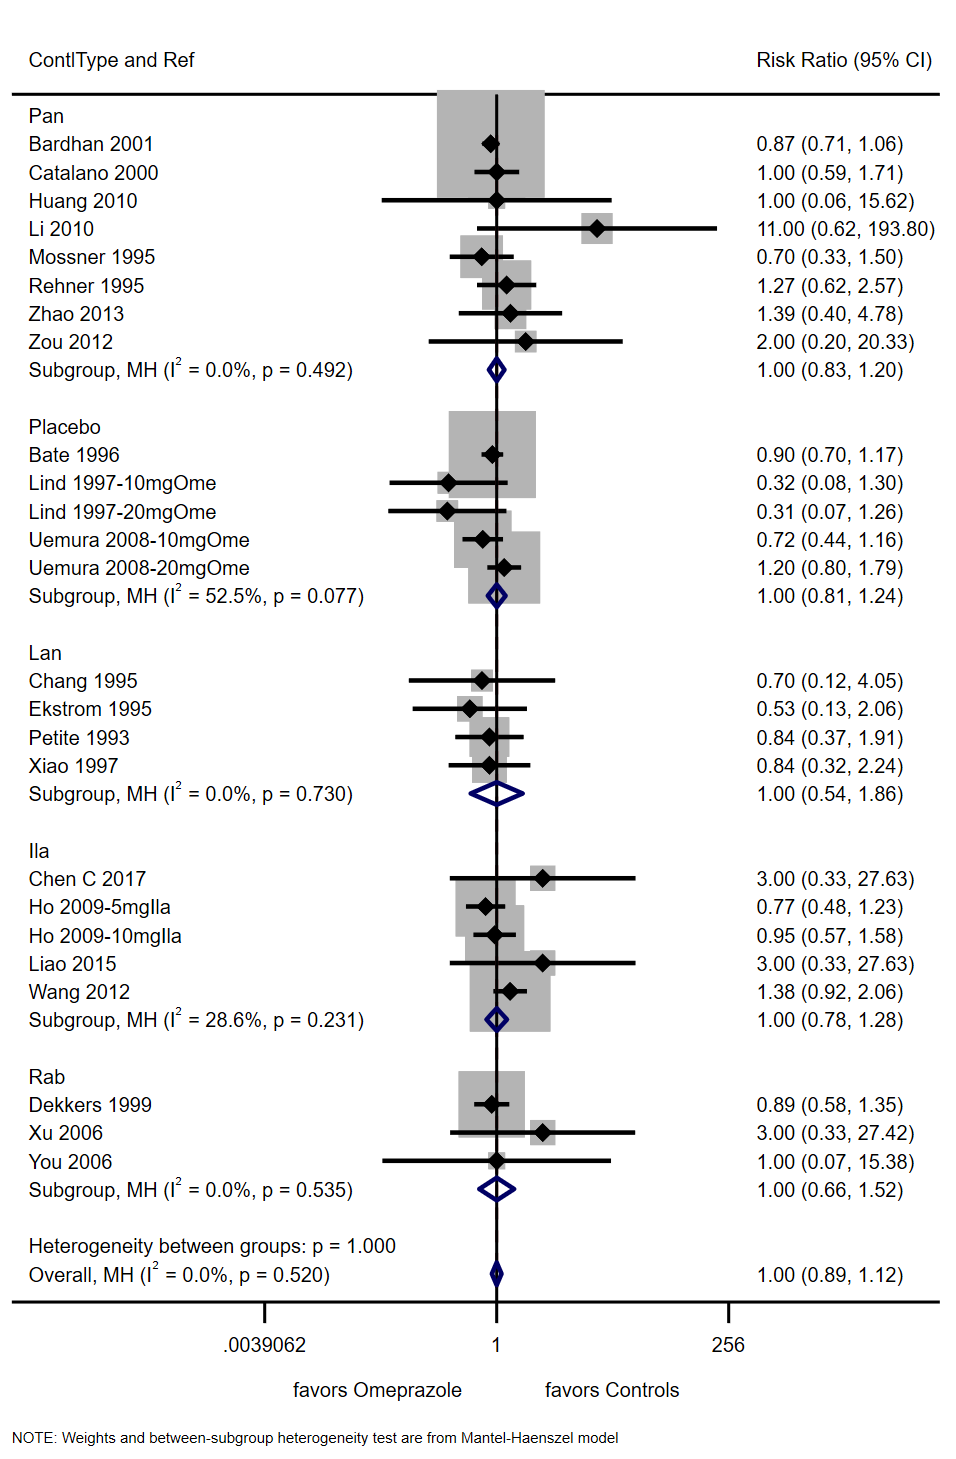


**Supplementary Information Figure 4**. Forest plot of relative risk of frequency of adverse events of omeprazole compared to controls.

**Abbreviations**: Eso, esomeprazole; Ila, ilaprazole; Lan, lansoprazole; Pan, pantoprazole; Rab, rabeprazole.


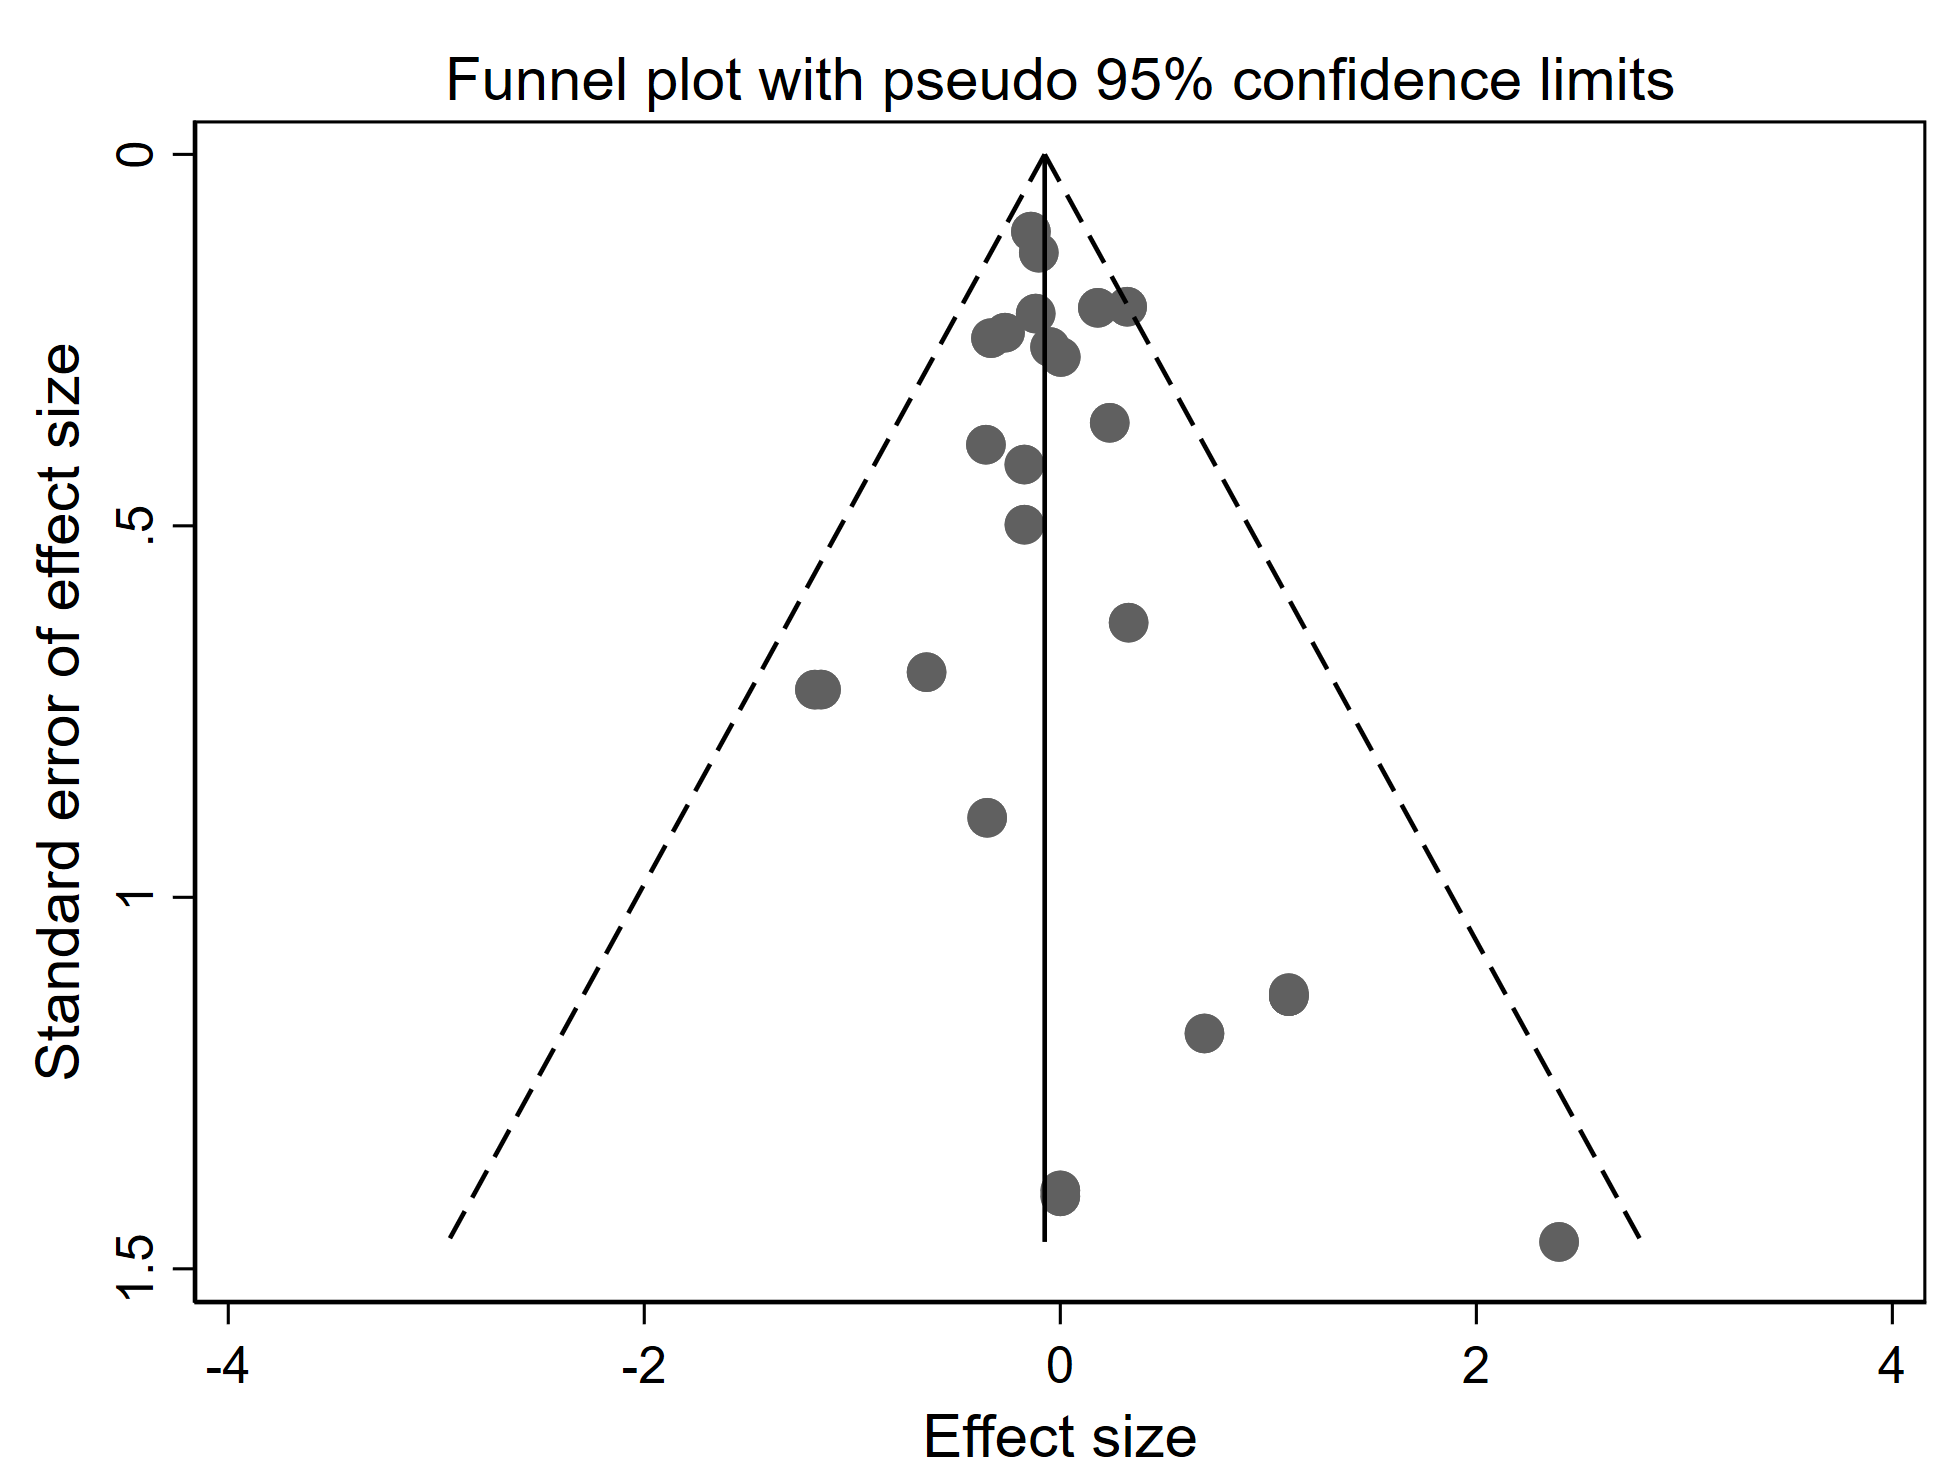


**Supplementary Information Figure 5.** Funnel plot of publication bias for trials reporting any adverse reactions data. Egger’s test (p=0.39) indicates no possible publication bias.


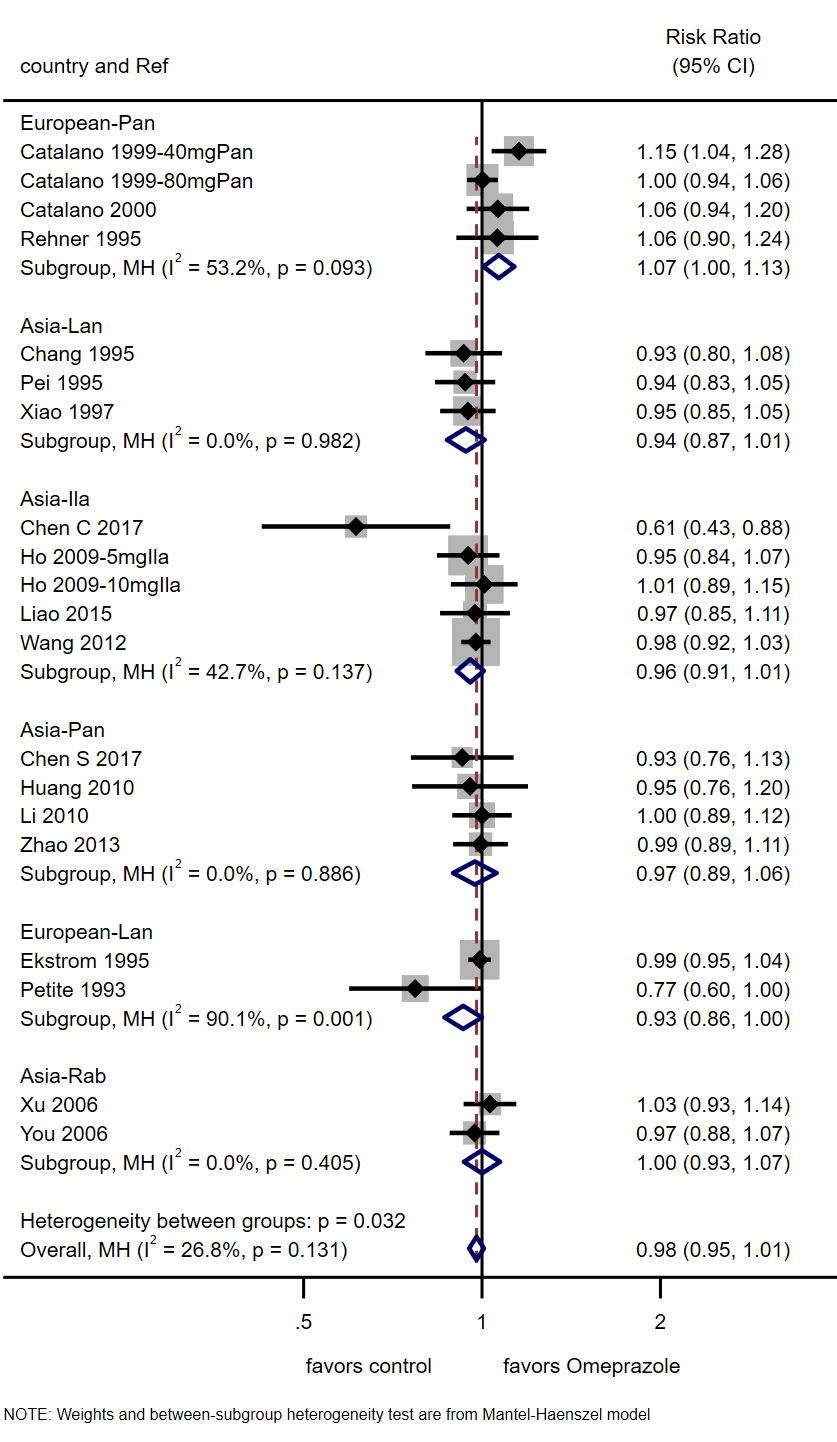


**Supplementary Information Figure 6.** Ulcer healing by country where trial was conducted and by type of proton pump inhibitor.

**Abbreviations**: Ila, ilaprazole; Lan, lansoprazole; Pan, pantoprazole; Rab, rabeprazole.


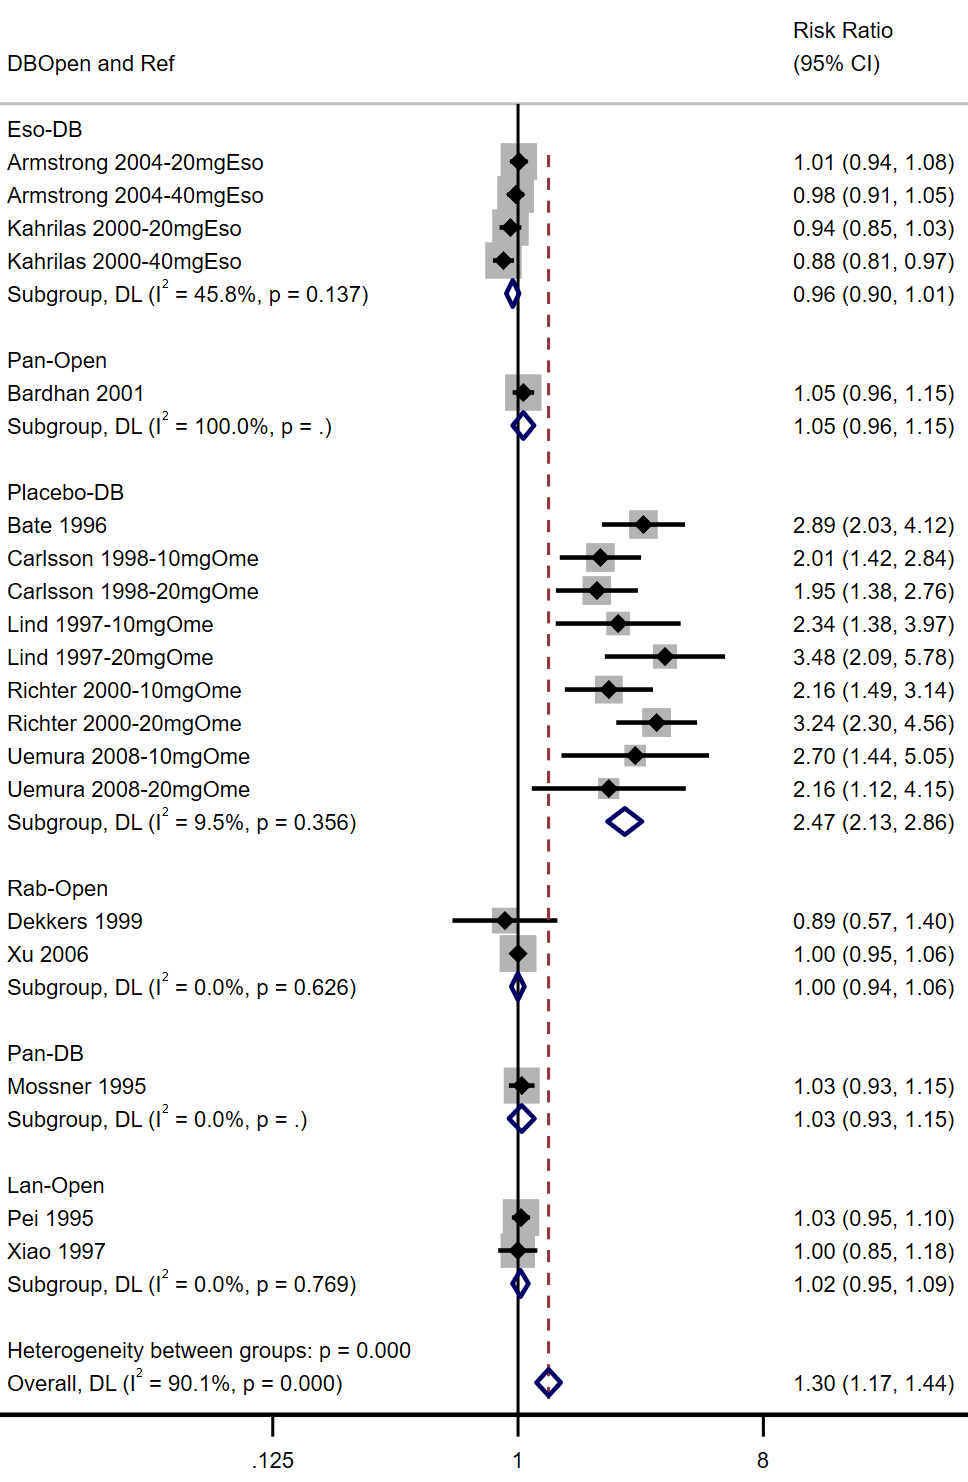


**Supplementary Information Figure 7.** Subgroup-degree of blinding for heartburn relief.

**Abbreviations**: DB, double blinded; Eso, esomeprazole; Lan, lansoprazole; Pan, pantoprazole; Rab, rabeprazole.


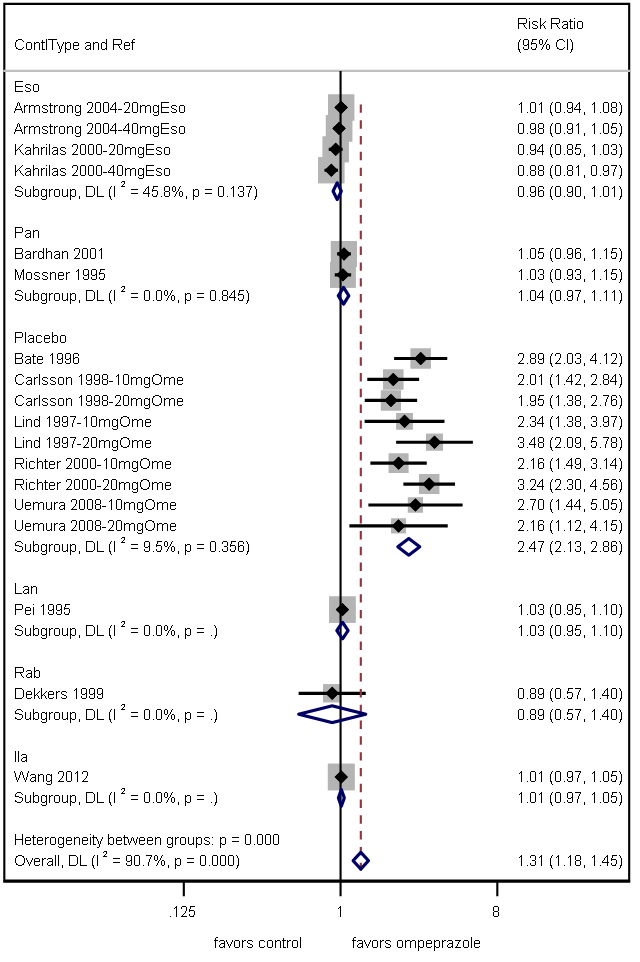


**Supplementary Information Figure 8**. Trials with low risk of bias for outcome: heartburn symptoms relieved/improved/cured.

**Abbreviations**: Eso, esomeprazole; Ila, ilaprazole; Lan, lansoprazole; Pan, pantoprazole; Rab, rabeprazole.

**Supplementary Information Figure 9.** Trials with low risk of bias for outcome erosion/ulcer healed.

**Abbreviations**: Eso, esomeprazole; Ila, ilaprazole; Lan, lansoprazole; Pan, pantoprazole; Rab, rabeprazole.

**Supplementary Information Figure 10**. Data Extraction Form

**DEP One page Template REFERENCE:** ___________________________________
Reviewed by: #1 _________ Reviewer #2 (fill in scores in [ +1/0/na] brackets please _________

|  | **Omeprazole** (n= ) |  |  |  |
| --- | --- | --- | --- | --- |
| Daily dose (mg/day): |  |  |  |  |
| Duration intervention period (txt time): |  |  |  |  |
| Duration follow-up (post-intervention): |  |  |  |  |
| Formulation:  (capsule, tablet, other, not described) |  |  |  |  |
| Same appearance? (blinded or open) |  |  |  |  |

**Title/Introduction/Abstract**
_ _ [ ]_ 1. RCT or crossover _______________________ page ____
_ _ [ ]_ 2. Background _______________________ page _____
_ _ [ ]_ 3. Aims _______________________ page ____
_ _ [ ]_ 4. Setting _______________________ page ____ **+1 if any reported**
 Country Rural/urban Age #sites In/outpatient Hp +/-
 **METHODS**
_ _ [ ]_ 5. Inclusion/exclusion _______________________ page ____
 *Type of APD: _[Ulcers/NERD/ERD]_______________* page ____
_ _ [ ]_ 6. Sample size calculations _______________________ page ____
_ _ [ ]_ 7. Statistical methods _______________________ page ____
_ _ [ ]_ 8. Recruitment/referral _______________________ page ____
_ _ [ ]_ 9. Random list method _______________________ page ____
_ _ [ ]_ 10. Allocation conceal method _____________________ page ____
_ _ [ ]_ 11. Blinding ______ single (+1)_______double _____(+1 or open (0) page ___
_ _ [ ]_ 12. Outcome assessor blinded _______________________ page ____
_ _ [ ]_ 13. Attrition: ___________rate _______reasons ___ by group _____ page __________
_ _ [ ]_ 14. Post-hoc outcomes (+1 if only *a priori*) _____________________ page ____
_ _ [ ]_ 15. Intervention (+1 if type dose and duration) page _____

 Other therapies givens too (antacids) _____________ page _____________

_ _ [ ]_ 16. Baseline comparison table/text _______________________ page ____
_ _ [ ]_ 17. Consort flowchart (>2006) _______________________ page ____
_ _ [ ]_ 18. Primary outcome defined _______________________ page ____

 Primary outcome assessed how: _____________________________ page ____

_ _ [ ]_ ___19. Outcome data Source= page in paper, Figures or Tables

| **Outcomes** | **10 or 20 outcome** | **Omeprazole-  (n= )** | **p value** | **Control** |  | **Source** |
| --- | --- | --- | --- | --- | --- | --- |
| *nr=not reported/ns=not sign* | | | | | | |
| ***Primary Outcome:*** |  |  |  |  |  |  |
| Number (%) reporting improved symptoms | 10 |  |  |  |  |  |
| % ulcer healed (by wk ) |  |  |  |  |  |  |
|  |  |  |  |  |  |  |
| Mean change in symptom scores from baseline to study end |  | + |  | + | + |  |
|  |  |  |  |  |  |  |
|  |  |  |  |  |  |  |
| ***Secondary outcomes*:** |  |  |  |  |  |  |
| *H. pylori* eradication |  |  |  |  |  |  |
| Days pH>4 for >24 hrs |  |  |  |  |  |  |
| # remaining in remission |  |  |  |  |  |  |
| # GI disorders (bleeding) |  |  |  |  |  |  |
| Quality of life score |  | + |  | + | + |  |
|  |  |  |  |  |  |  |

| **Sub-groups reported** | **Omeprazole** | **Other PPI control** | **Other control** | **Other control** |
| --- | --- | --- | --- | --- |
| Night/day symptoms |  |  |  |  |
| Hp+ vs Hp- |  |  |  |  |
|  |  |  |  |  |
|  |  |  |  |  |
|  |  |  |  |  |
|  |  |  |  |  |

|  | **Omep** |  |  |  |  |
| --- | --- | --- | --- | --- | --- |
| Only statement ‘No AEs” |  |  |  |  |  |
| # subjects with AEs |  |  |  |  |  |
| # Serious AEs |  |  |  |  |  |
| Types of AEs found |  |  |  |  |  |
|  |  |  |  |  |  |
|  |  |  |  |  |  |
|  |  |  |  |  |  |
|  |  |  |  |  |  |

_ [ ] _ 20. Adverse events Page _____

No AE data reported=0

+1 if any AE data or
just statement
none were found

DISCUSSION
_ [ ]__ 21. Limitations _____________________________ page _______
_ [ ]__ 22. Generalizabiity ___________________________ page ______
_ [ ]__ 23. Other studies _____________________________ page ______
_ [ ]__ 24. Trial registered (>2006) __________yes _______ no page ______

**Reviewer #1:** ____________
# items present___________ # items absent _________ # items na _____: TOTAL Score __________

**Reviewer #2:** ________
# items present___________ # items absent _________ # items na _____: TOTAL Score ___________

**RISK OF BIAS** (low=more present than not; vs high=more factors not present)
1. Randomization process (allocation random/blinded/baseline comparison) ___________
2. Deviations (subject blinded, staff blinded or open kept protocol) ___________
3. Missing outcome data (outcome for most/outcome not impacted
 by attrition/APP, ITT=APP, similar attrition/group) ___________
4. Outcome measure (good measure, same for all, assessors blinded
 or not impacted by lack of blinding) ___________
5. Selection of reported outcomes (a priori outcomes/post-hoc outcomes
 not used for efficacy) ___________
6. OVERALL BIAS: (LOW=all had low rank vs HIGH >2 had high rank that
 might impact efficacy result vs SOME CONCERNS
 (1 domain had high risk) ___________
